# Supplementary material for: Examination of the accuracy of SHRIMP U–Pb geochronology based on samples dated by both SHRIMP and CA-TIMS
Source: Copernicus journal article supplement (doi:10.5194/gchron-5-1-2023), 2023-01-11
Supplement: Supplementary file 1 [file gchron-5-1-2023-supplement.zip]

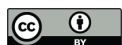

## *Supplement of*

# **Examination of the accuracy of SHRIMP U–Pb geochronology based on samples dated by both SHRIMP and CA-TIMS**

**Charles W. Magee Jr. et al.**

*Correspondence to:* Charles W. Magee Jr. ([charles.magee@ga.gov.au](mailto:charles.magee@ga.gov.au))

- [gchron-5-1-2023-supplement-title-page.pdf](#)
- [Supplement Table Captions.docx](#)
- [Table S1-SpotToSpot\\_Std\\_Lab\\_Instrument-short.xls](#)
- [Table S2-Boise-Combined.xls](#)
- [Table S3-UBCcombined.xls](#)
- [Table S4-Combined.xls](#)

The copyright of individual parts of the supplement might differ from the article licence.
